# Supplementary material
Source: Springer Nature journal article supplement (https://www.springermedizin.de/resource/supplementary/12889_2012_4770_MOESM2_ESM.pdf/9491580)
Supplement: MOESM2 [file 9491580]

**PILOT STUDY**

**GENERAL PRACTICE RECRUITMENT,  
N=42\***

**RCT BASELINE PROFILE MEASURES**

Young People's Exit Surveys  
Practice snapshot  
Staff surveys

**RANDOMISATION**

**INTERVENTION (21)**

Training: 9 hrs (GPs, PNs)  
Training: 2 hrs (PSS)  
Practice visits: 2  
Screening tool  
Pamphlets/Resources  
Referral lists

**POST-INTERVENTION  
YP (N=600\*) & PARENT**

**3 MTH FOLLOW-UP of YP  
& PRACTICE STAFF**

**12 MTH FOLLOW-UP of YP**

**COMPARISON (21)**

Seminar: 3 hrs (GPs, PNs)

**POST-INTERVENTION  
YP (N=600\*) & PARENT**

**3 MTH FOLLOW-UP of YP  
& PRACTICE STAFF**

**12 MTH FOLLOW-UP of YP**
